# Supplementary material for: Successful treatment by on-demand glecaprevir and pibrentasvir for hepatitis C flare during R-CHOP in patients with diffuse large B-cell lymphoma: a case report
Source: Springer Nature journal article supplement (doi:10.1186/s12879-021-06091-x), 2021-04-27
Supplement: MOESM1 [file 19110678]

a.

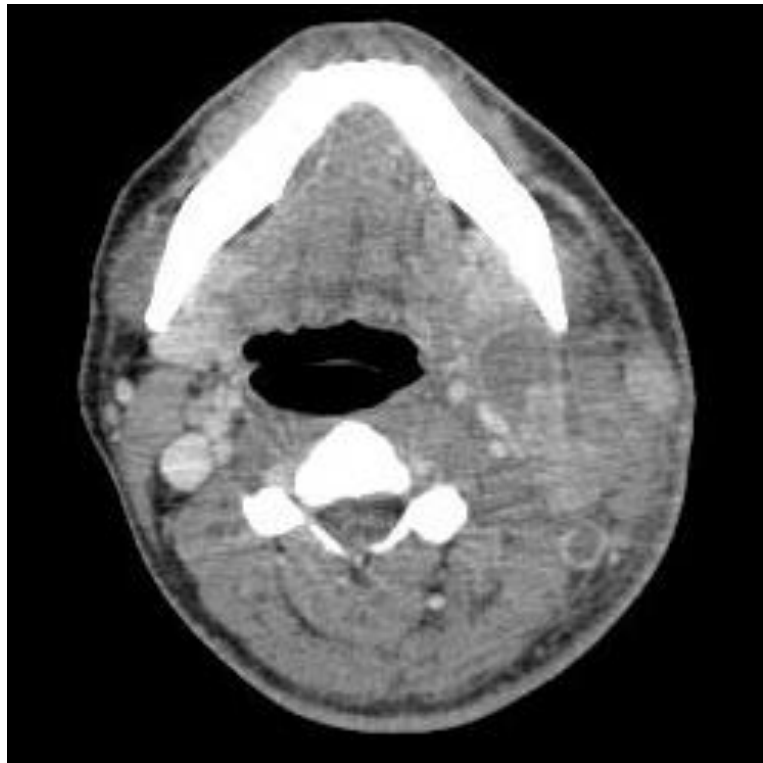

b.

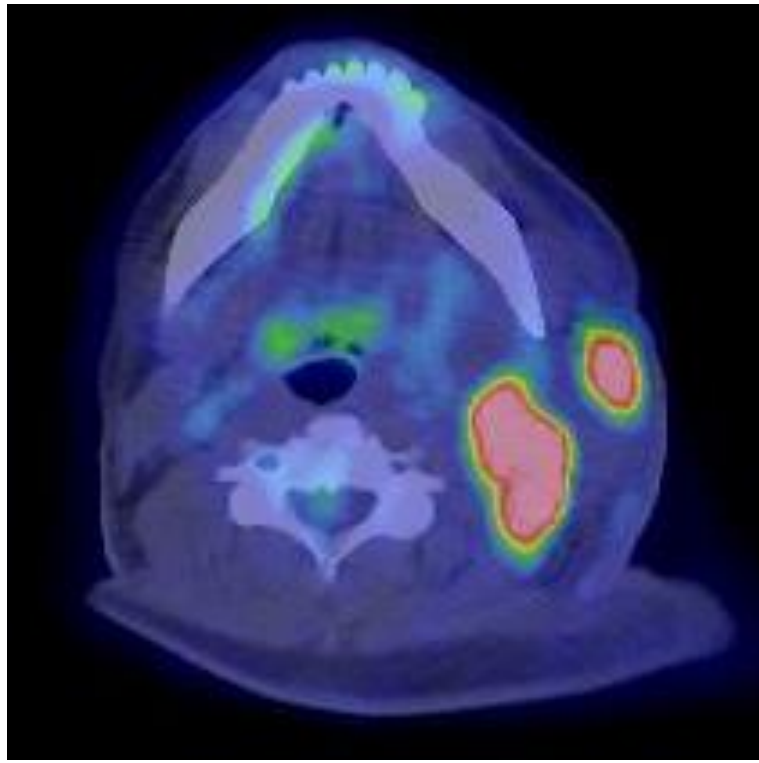

c.

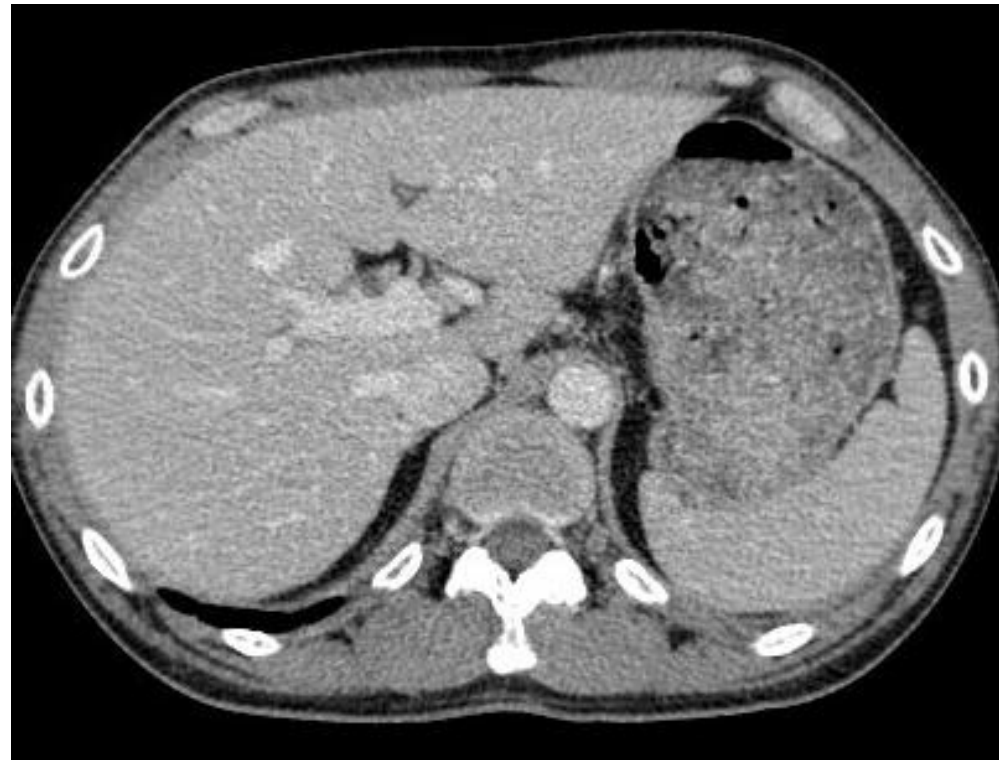

Supplementary Figure1.
